# Supplementary material
Source: publisher figshare collection journal article supplement (https://sage.figshare.com/ndownloader/files/12728252)
Supplement: Supplementary file 1 [file 12728252]

Table S.3: Annual hazard for the underlying ER-specific survival curves (in the absence of screening and treatment) by stage and size at detection.
